# Supplementary material for: Feeding habits of four-finger threadfin fish, Eleutheronema tetradactylum, and its diet interaction with co-existing fish species in the coastal waters of Thailand
Source: PeerJ. 2023 Jan 30;11:e14688. doi: 10.7717/peerj.14688 (PMC9893912; doi:10.7717/peerj.14688)
Supplement: Supplemental Information 1 [file peerj-11-14688-s001.xlsx]

## Sheet: length mouth prey
Relation:		COMPLETE DATA								Standard Length (CM)	mouth area		Standard Length (CM)	all prey dimension		mouth area	all prey dimension
outcome:		Average Length			df: 132					7.17649	0.468096		7.17649	2.535		0.468096	2.535
predictor		coeff	SE	t	p-value	95% C.I.				7.55879	0.35168		7.55879	0.84		0.35168	0.84
constant		3.12892	0.403386	7.75663	2.09639e-12	2.33098	3.92686			13.6	1.29525		13.6	4.015		1.29525	4.015
mouth area		0.265765	0.046739	5.68615	7.9742e-08	0.173311	0.358219			22.96	7.02025		22.96	5.46		7.02025	5.46
r-sq:	0.196749	Resid SS:	686.686	s:	2.28083					24.5	5.6991		24.5	5.09667		5.6991	5.09667
										24.56	7.76459		24.56	9.24		7.76459	9.24
Fitted line:		Average Length = 3,1289 + 0,2658 mouth area								25	6.7353		25	5.58222		6.7353	5.58222
										25.1	7.51245		25.1	1.82		7.51245	1.82
										25.2	9.97735		25.2	3.08		9.97735	3.08
										25.61	5.652		25.61	8.73		5.652	8.73
										28.2	14.5068		28.2	4.9		14.5068	4.9
										33.2	11.2647		33.2	5.96778		11.2647	5.96778
										33.6	16.7362		33.6	29.12		16.7362	29.12
										15.3	1.3816		15.3	5.61		1.3816	5.61
										19.5457	2.06062		19.5457	5.4		2.06062	5.4
										25.3	6.90046		25.3	9.36		6.90046	9.36
										25.73	5.8875		25.73	7.13		5.8875	7.13
										25.16	6.76992		25.16	7.9375		6.76992	7.9375
										22.524	5.50206		22.524	8.97		5.50206	8.97
										27.466	8.76452		27.466	10.5		8.76452	10.5
										39.2531	15.5823		39.2531	13.5		15.5823	13.5
										19.52	5.16805		19.52	4.92		5.16805	4.92
										19.7965	4.239		19.7965	4		4.239	4
										22.2509	4.71		22.2509	4.2		4.71	4.2
										23.3	9.06675		23.3	11.7		9.06675	11.7
										24.09	5.23595		24.09	4.98		5.23595	4.98
										24.45	7.72848		24.45	5.04		7.72848	5.04
										25.1	6.5312		25.1	10.22		6.5312	10.22
										25.6606	4.60465		25.6606	4.1		4.60465	4.1
										26.2149	6.99435		26.2149	6.75		6.99435	6.75
										27.14	5.8404		27.14	6.58		5.8404	6.58
										27.49	6.08375		27.49	5.04		6.08375	5.04
										27.96	9.40414		27.96	15.96		9.40414	15.96
										29.75	7.4732		29.75	7.28		7.4732	7.28
										29.88	10.8016		29.88	10.6535		10.8016	10.6535
										32.9456	12.6991		32.9456	6.24		12.6991	6.24
										39.9733	14.3674		39.9733	11.748		14.3674	11.748
										19.7622	3.95247		19.7622	1		3.95247	1
										20.35	4.2861		20.35	1.2		4.2861	1.2
										21.4	4.92195		21.4	1.1		4.92195	1.1
										23.9705	5.27206		23.9705	2.08		5.27206	2.08
										24.3172	6.59369		24.3172	2.37		6.59369	2.37
										24.78	6.02095		24.78	19.5581		6.02095	19.5581
										26.0751	7.4732		26.0751	3.84		7.4732	3.84
										27.1324	7.16548		27.1324	2.05556		7.16548	2.05556
										28.8679	6.9394		28.8679	2.37		6.9394	2.37
										28.87	8.32595		28.87	5.16		8.32595	5.16
										29.89	10.0151		29.89	2.01167		10.0151	2.01167
										30.61	9.64985		30.61	17.85		9.64985	17.85
										30.62	10.162		30.62	2.43		10.162	2.43
										31.0193	9.71438		31.0193	10		9.71438	10
										32.0371	11.6455		32.0371	2.6		11.6455	2.6
										32.59	11.905		32.59	1.875		11.905	1.875
										33.81	9.64372		33.81	12.42		9.64372	12.42
										28.9001	9.57543		28.9001	10.14		9.57543	10.14
										25.22	9.25476		25.22	8.712		9.25476	8.712
										5.90095	0.11775		5.90095	0.28		0.11775	0.28
										6.18044	0.11775		6.18044	0.64		0.11775	0.64
										7.07483	0.2826		7.07483	0.26		0.2826	0.26
										7.61912	0.16485		7.61912	2.45		0.16485	2.45
										8.1497	0.344772		8.1497	2		0.344772	2
										9.38951	1.05394		9.38951	1.61311		1.05394	1.61311
										13.1	1.2089		13.1	8.04		1.2089	8.04
										13.9	1.53075		13.9	1.6		1.53075	1.6
										14.2	1.9782		14.2	1.92		1.9782	1.92
										14.9	2.5905		14.9	1.825		2.5905	1.825
										16.6	2.512		16.6	1.88333		2.512	1.88333
										20.11	3.32605		20.11	1.188		3.32605	1.188
										20.67	5.32544		20.67	1.3536		5.32544	1.3536
										23.06	8.17546		23.06	2.232		8.17546	2.232
										24	6.4056		24	8.45		6.4056	8.45
										24.65	8.26197		24.65	22.05		8.26197	22.05
										24.8	6.7824		24.8	5.22		6.7824	5.22
										25.6	5.2752		25.6	1.55		5.2752	1.55
										26.01	8.67017		26.01	16.7608		8.67017	16.7608
										26.9	7.693		26.9	8.125		7.693	8.125
										27.1	10.3269		27.1	10.14		10.3269	10.14
										27.68	9.34464		27.68	17.408		9.34464	17.408
										28.22	8.17907		28.22	1.5		8.17907	1.5
										31.5461	9.8439		31.5461	7.31876		9.8439	7.31876
										32.1	15.6136		32.1	28.48		15.6136	28.48
										35.3942	12.1786		35.3942	1.56		12.1786	1.56
										16.5045	1.9782		16.5045	3.72		1.9782	3.72
										18.5526	2.31182		18.5526	4.05		2.31182	4.05
										19.3444	3.50502		19.3444	6.72		3.50502	6.72
										19.5283	4.2861		19.5283	9		4.2861	9
										19.56	1.90755		19.56	3.22		1.90755	3.22
										20.45	4.63229		20.45	11.83		4.63229	11.83
										25.4	8.007		25.4	14.56		8.007	14.56
										26.2	6.4056		26.2	12.98		6.4056	12.98
										26.34	5.96208		26.34	3.9		5.96208	3.9
										26.6002	8.40735		26.6002	1.32		8.40735	1.32
										26.78	8.478		26.78	3		8.478	3
										27.4	11.932		27.4	20.54		11.932	20.54
										27.69	8.478		27.69	3.41		8.478	3.41
										28.03	6.28		28.03	4.8		6.28	4.8
										28.33	7.57117		28.33	1.92		7.57117	1.92
										28.46	11.9085		28.46	9.937		11.9085	9.937
										28.5278	6.60201		28.5278	7.776		6.60201	7.776
										29.04	7.91987		29.04	2.5		7.91987	2.5
										29.23	9.6555		29.23	5.85		9.6555	5.85
										30.6733	9.49065		30.6733	4.08		9.49065	4.08
										32.12	11.8664		32.12	8.84		11.8664	8.84
										32.34	9.5927		32.34	5.876		9.5927	5.876
										33.5337	15.5744		33.5337	23.5538		15.5744	23.5538
										35.4152	11.9031		35.4152	20.3632		11.9031	20.3632
										35.9886	19.2799		35.9886	20.44		19.2799	20.44
										39.363	14.1239		39.363	12.2		14.1239	12.2
										39.86	15.9892		39.86	14.26		15.9892	14.26
										40.28	16.0564		40.28	14.9138		16.0564	14.9138
										44.3184	19.6925		44.3184	32.2		19.6925	32.2
										17.5303	4.40385		17.5303	4.68		4.40385	4.68
										18.06	2.4335		18.06	3.1		2.4335	3.1
										18.2434	2.23725		18.2434	3.96		2.23725	3.96
										19.11	5.90807		19.11	4.68		5.90807	4.68
										23.4588	5.06011		23.4588	3.85		5.06011	3.85
										24.61	7.2063		24.61	6.7		7.2063	6.7
										24.65	6.20542		24.65	5.33		6.20542	5.33
										24.8013	4.45943		24.8013	4.2		4.45943	4.2
										25.21	7.77268		25.21	18.69		7.77268	18.69
										26.17	6.47625		26.17	5.4		6.47625	5.4
										26.21	9.74782		26.21	14.359		9.74782	14.359
										27.35	11.3935		27.35	4.9059		11.3935	4.9059
										27.81	5.69125		27.81	4.81		5.69125	4.81
										30.5917	12.1989		30.5917	14		12.1989	14
										32.1	11.4506		32.1	16.56		11.4506	16.56
										33.1	11.8134		33.1	22.68		11.8134	22.68
										46.11	20.2769		46.11	31.85		20.2769	31.85
										26.79	8.48648		26.79	6.68667		8.48648	6.68667
										29.1	8.48114		29.1	8.3		8.48114	8.3
										23	7.7715		23	6.19556		7.7715	6.19556
										24.1	6.86875		24.1	17.94		6.86875	17.94
										25.3	6.28		25.3	21.34		6.28	21.34
										25.9	8.1326		25.9	12.46		8.1326	12.46
													46.11	32.2
													5.90095	0.26

## Sheet: mouth and fish prey
N0	No sample	Standard Length (CM)	Vertical Mouth (CM)	Horizontal Mouth (CM)	mouth area	PL1	PL2	PL3	Average Length	PH1	PH2	PH3	Average Height	prey dimension	prey name		mouth area	prey dimension		Standard Length (CM)	prey dimension		mouth area	Average Height			mouth area	Average Length
10	6	13.6	1.1	1.5	1.29525	4.2	3.1		3.65	1.2	1		1.1	4.015	Ambassis marianus		1.29525	4.015		13.6	4.015		1.29525	1.1			1.29525	3.65
36	29	22.96	2.71	3.3	7.02025	4.2			4.2	1.3			1.3	5.46	Ambassis marianus		7.02025	5.46		22.96	5.46		7.02025	1.3			7.02025	4.2
47	12	24.5	2.2	3.3	5.6991	4.2	5.6	4.1	4.63333	1.2	1.1	1	1.1	5.09667	Ambassis marianus		5.6991	5.09667		24.5	5.09667		5.6991	1.1			5.6991	4.63333
48	24	24.56	2.81	3.52	7.76459	4.2			4.2	2.2			2.2	9.24	Ambassis marianus		7.76459	9.24		24.56	9.24		7.76459	2.2			7.76459	4.2
55	25	25	2.6	3.3	6.7353	6.7	5.2	3.8	5.23333	1.6	1.1	0.5	1.06667	5.58222	Ambassis marianus		6.7353	5.58222		25	5.58222		6.7353	1.06667			6.7353	5.23333
56	23	25.1	2.9	3.3	7.51245	2.6			2.6	0.7			0.7	1.82	Ambassis marianus		7.51245	1.82		25.1	1.82		7.51245	0.7			7.51245	2.6
59	22	25.2	3.1	4.1	9.97735	2.8			2.8	1.1			1.1	3.08	Ambassis marianus		9.97735	3.08		25.2	3.08		9.97735	1.1			9.97735	2.8
66	9	25.61	2.4	3	5.652	4.6	5.1		4.85	2.1	1.5		1.8	8.73	Ambassis marianus		5.652	8.73		25.61	8.73		5.652	1.8			5.652	4.85
93	6	28.2	4.2	4.4	14.5068	3.5			3.5	1.4			1.4	4.9	Ambassis marianus		14.5068	4.9		28.2	4.9		14.5068	1.4			14.5068	3.5
121	6	33.2	3.5	4.1	11.2647	4.6	4.3	4.2	4.36667	1.4	1.4	1.3	1.36667	5.96778	Ambassis marianus		11.2647	5.96778		33.2	5.96778		11.2647	1.36667			11.2647	4.36667
123	8	33.6	4.1	5.2	16.7362	11.2			11.2	2.6			2.6	29.12	Ambassis marianus		16.7362	29.12		33.6	29.12		16.7362	2.6			16.7362	11.2
14	9	15.3	1.1	1.6	1.3816	5.1			5.1	1.1			1.1	5.61	Atherinomorus lacunosus		1.3816	5.61		15.3	5.61		1.3816	1.1			1.3816	5.1
25	69	19.5457	1.5	1.75	2.06062	5.4			5.4	1			1	5.4	Atherinomorus lacunosus		2.06062	5.4		19.5457	5.4		2.06062	1			2.06062	5.4
62	5	25.3	2.68	3.28	6.90046	7.2			7.2	1.3			1.3	9.36	Atherinomorus lacunosus		6.90046	9.36		25.3	9.36		6.90046	1.3			6.90046	7.2
68	23	25.73	2.5	3	5.8875	6.2			6.2	1.15			1.15	7.13	Atherinomorus lacunosus		5.8875	7.13	Upper 95.0%	25.73	7.13		5.8875	1.15			5.8875	6.2
58	6	25.16	2.67	3.23	6.76992	6.5	6.2		6.35	1.3	1.2		1.25	7.9375	Dussumieria elopsoides		6.76992	7.9375	6.45343	25.16	7.9375		6.76992	1.25			6.76992	6.35
35	24	22.524	2.15	3.26	5.50206	6.9			6.9	1.3			1.3	8.97	Eleutheronema tetradactylum		5.50206	8.97	0.408349	22.524	8.97		5.50206	1.3			5.50206	6.9
86	13	27.466	2.9	3.85	8.76452	7			7	1.5			1.5	10.5	Eleutheronema tetradactylum		8.76452	10.5		27.466	10.5		8.76452	1.5			8.76452	7
128	30	39.2531	3.97	5	15.5823	7.5			7.5	1.8			1.8	13.5	Eleutheronema tetradactylum		15.5823	13.5		39.2531	13.5		15.5823	1.8			15.5823	7.5
23	25	19.52	2.31	2.85	5.16805	4.1			4.1	1.2			1.2	4.92	Encrasicholina devisi		5.16805	4.92		19.52	4.92		5.16805	1.2			5.16805	4.1
28	17	19.7965	2	2.7	4.239	4			4	1			1	4	Encrasicholina devisi		4.239	4		19.7965	4		4.239	1			4.239	4
34	15	22.2509	2	3	4.71	4.2			4.2	1			1	4.2	Encrasicholina devisi		4.71	4.2		22.2509	4.2		4.71	1			4.71	4.2
39	5	23.3	3.3	3.5	9.06675	7.8			7.8	1.5			1.5	11.7	Encrasicholina devisi		9.06675	11.7		23.3	11.7		9.06675	1.5			9.06675	7.8
43	19	24.09	2.3	2.9	5.23595	4.15			4.15	1.2			1.2	4.98	Encrasicholina devisi		5.23595	4.98		24.09	4.98		5.23595	1.2			5.23595	4.15
46	9	24.45	3.02	3.26	7.72848	4.2			4.2	1.2			1.2	5.04	Encrasicholina devisi		7.72848	5.04		24.45	5.04		7.72848	1.2			7.72848	4.2
57	1	25.1	2.6	3.2	6.5312	7.3			7.3	1.4			1.4	10.22	Encrasicholina devisi		6.5312	10.22		25.1	10.22		6.5312	1.4			6.5312	7.3
67	1	25.6606	2.11	2.78	4.60465	4.1			4.1	1			1	4.1	Encrasicholina devisi		4.60465	4.1		25.6606	4.1		4.60465	1			4.60465	4.1
75	11	26.2149	2.7	3.3	6.99435	4.5			4.5	1.5			1.5	6.75	Encrasicholina devisi		6.99435	6.75		26.2149	6.75		6.99435	1.5			6.99435	4.5
83	25	27.14	2.4	3.1	5.8404	4.7			4.7	1.4			1.4	6.58	Encrasicholina devisi		5.8404	6.58		27.14	6.58		5.8404	1.4			5.8404	4.7
87	14	27.49	2.5	3.1	6.08375	4.2			4.2	1.2			1.2	5.04	Encrasicholina devisi		6.08375	5.04		27.49	5.04		6.08375	1.2			6.08375	4.2
91	15	27.96	3.01	3.98	9.40414	8.4			8.4	1.9			1.9	15.96	Encrasicholina devisi		9.40414	15.96		27.96	15.96		9.40414	1.9			9.40414	8.4
104	1	29.75	2.8	3.4	7.4732	5.6			5.6	1.3			1.3	7.28	Encrasicholina devisi		7.4732	7.28		29.75	7.28		7.4732	1.3			7.4732	5.6	Lower 95.0%	Upper 95.0%
105	14	29.88	3.2	4.3	10.8016	6.8	8.1		7.45	1.25	1.61		1.43	10.6535	Encrasicholina devisi		10.8016	10.6535		29.88	10.6535		10.8016	1.43			10.8016	7.45	2.2929	6.02334
119	23	32.9456	3.66	4.42	12.6991	4.8			4.8	1.3			1.3	6.24	fish		12.6991	6.24		32.9456	6.24		12.6991	1.3			12.6991	4.8	0.368168	1.03153
131	7	39.9733	3.72	4.92	14.3674	8.9			8.9	1.32			1.32	11.748	fish		14.3674	11.748		39.9733	11.748		14.3674	1.32			14.3674	8.9
27	12	19.7622	1.9	2.65	3.95247	2			2	0.5			0.5	1	Leiognathus equulus		3.95247	1		19.7622	1		3.95247	0.5			3.95247	2
30	9	20.35	2.1	2.6	4.2861	2			2	0.6			0.6	1.2	Leiognathus equulus		4.2861	1.2		20.35	1.2		4.2861	0.6			4.2861	2
33	5	21.4	2.2	2.85	4.92195	2.2			2.2	0.5			0.5	1.1	Leiognathus equulus		4.92195	1.1		21.4	1.1		4.92195	0.5			4.92195	2.2
41	21	23.9705	2.3	2.92	5.27206	2.4	2.5	2.9	2.6	0.6	0.8	1	0.8	2.08	Leiognathus equulus		5.27206	2.08		23.9705	2.08		5.27206	0.8			5.27206	2.6
45	20	24.3172	2.53	3.32	6.59369	2.7	2.4	2.8	2.63333	0.9	0.8	1	0.9	2.37	Leiognathus equulus		6.59369	2.37		24.3172	2.37		6.59369	0.9			6.59369	2.63333
52	4	24.78	2.6	2.95	6.02095	7.15	7.1	5.2	6.48333	3.25	3	2.8	3.01667	19.5581	Leiognathus equulus		6.02095	19.5581		24.78	19.5581		6.02095	3.01667			6.02095	6.48333
71	14	26.0751	2.8	3.4	7.4732	3.2			3.2	1.2			1.2	3.84	Leiognathus equulus		7.4732	3.84		26.0751	3.84		7.4732	1.2			7.4732	3.2
82	17	27.1324	2.8	3.26	7.16548	2.6	2.3	2.5	2.46667	0.8	0.8	0.9	0.833333	2.05556	Leiognathus equulus		7.16548	2.05556		27.1324	2.05556		7.16548	0.833333			7.16548	2.46667
98	16	28.8679	2.6	3.4	6.9394	2.7	2.4	2.8	2.63333	0.9	0.8	1	0.9	2.37	Leiognathus equulus		6.9394	2.37		28.8679	2.37		6.9394	0.9			6.9394	2.63333
99	15	28.87	2.89	3.67	8.32595	4.3			4.3	1.2			1.2	5.16	Leiognathus equulus		8.32595	5.16		28.87	5.16		8.32595	1.2			8.32595	4.3
106	19	29.89	3.22841	3.95182	10.0151	2.5	2.1	2.5	2.36667	0.8	0.85	0.9	0.85	2.01167	Leiognathus equulus		10.0151	2.01167		29.89	2.01167		10.0151	0.85			10.0151	2.36667
108	4	30.61	3.12	3.94	9.64985	7.14			7.14	2.5			2.5	17.85	Leiognathus equulus		9.64985	17.85		30.61	17.85		9.64985	2.5			9.64985	7.14
109	22	30.62	3.24925	3.98405	10.162	2.7			2.7	0.9			0.9	2.43	Leiognathus equulus		10.162	2.43		30.62	2.43		10.162	0.9			10.162	2.7
111	7	31.0193	3.3	3.75	9.71438	5			5	2			2	10	Leiognathus equulus		9.71438	10		31.0193	10		9.71438	2			9.71438	5
113	1	32.0371	3.45	4.3	11.6455	2.6			2.6	1			1	2.6	Leiognathus equulus		11.6455	2.6		32.0371	2.6		11.6455	1			11.6455	2.6
118	26	32.59	3.48609	4.35033	11.905	3	2.2	2.3	2.5	1	0.75	0.5	0.75	1.875	Leiognathus equulus		11.905	1.875		32.59	1.875		11.905	0.75			11.905	2.5
124	7	33.81	3.25	3.78	9.64372	5.4			5.4	2.3			2.3	12.42	Leiognathus equulus		9.64372	12.42		33.81	12.42		9.64372	2.3			9.64372	5.4
100	3	28.9001	3.21	3.8	9.57543	7.8			7.8	1.3			1.3	10.14	Mugil cephalus		9.57543	10.14		28.9001	10.14		9.57543	1.3			9.57543	7.8
17	104	17.5303	2.2	2.55	4.40385	3.6			3.6	1.3			1.3	4.68	Stolephorus commersonnii		4.40385	4.68		17.5303	4.68		4.40385	1.3			4.40385	3.6
18	160	18.06	1.55	2	2.4335	3.1			3.1	1			1	3.1	Stolephorus commersonnii		2.4335	3.1		18.06	3.1		2.4335	1			2.4335	3.1
19	154	18.2434	1.5	1.9	2.23725	3.3			3.3	1.2			1.2	3.96	Stolephorus commersonnii		2.23725	3.96		18.2434	3.96		2.23725	1.2			2.23725	3.3
21	30	19.11	2.42	3.11	5.90807	3.9			3.9	1.2			1.2	4.68	Stolephorus commersonnii		5.90807	4.68		19.11	4.68		5.90807	1.2			5.90807	3.9
40	7	23.4588	2.2	2.93	5.06011	3.5			3.5	1.1			1.1	3.85	Stolephorus commersonnii		5.06011	3.85		23.4588	3.85		5.06011	1.1			5.06011	3.5
49	25	24.61	2.7	3.4	7.2063	6.7			6.7	1			1	6.7	Stolephorus commersonnii		7.2063	6.7		24.61	6.7		7.2063	1			7.2063	6.7
51	2	24.65	2.55	3.1	6.20542	4.1			4.1	1.3			1.3	5.33	Stolephorus commersonnii		6.20542	5.33		24.65	5.33		6.20542	1.3			6.20542	4.1
54	2	24.8013	2.16	2.63	4.45943	3.5			3.5	1.2			1.2	4.2	Stolephorus commersonnii		4.45943	4.2		24.8013	4.2		4.45943	1.2			4.45943	3.5
60	2	25.21	2.87	3.45	7.77268	8.9			8.9	2.1			2.1	18.69	Stolephorus commersonnii		7.77268	18.69		25.21	18.69		7.77268	2.1			7.77268	8.9
72	18	26.17	2.5	3.3	6.47625	5.4			5.4	1			1	5.4	Stolephorus commersonnii		6.47625	5.4		26.17	5.4		6.47625	1			6.47625	5.4
74	11	26.21	3.12	3.98	9.74782	8.65			8.65	1.66			1.66	14.359	Stolephorus commersonnii		9.74782	14.359		26.21	14.359		9.74782	1.66			9.74782	8.65
84	15	27.35	3.54	4.1	11.3935	6.82	5.6		6.21	0.8	0.78		0.79	4.9059	Stolephorus commersonnii		11.3935	4.9059		27.35	4.9059		11.3935	0.79			11.3935	6.21
90	3	27.81	2.5	2.9	5.69125	3.7			3.7	1.3			1.3	4.81	Stolephorus commersonnii		5.69125	4.81		27.81	4.81		5.69125	1.3			5.69125	3.7
107	4	30.5917	3.7	4.2	12.1989	7			7	2			2	14	Stolephorus commersonnii		12.1989	14		30.5917	14		12.1989	2			12.1989	7
115	23	32.1	3.42609	4.25754	11.4506	7.2			7.2	2.3			2.3	16.56	Stolephorus commersonnii		11.4506	16.56		32.1	16.56		11.4506	2.3			11.4506	7.2
120	7	33.1	3.47409	4.33177	11.8134	8.1			8.1	2.8			2.8	22.68	Stolephorus commersonnii		11.8134	22.68		33.1	22.68		11.8134	2.8			11.8134	8.1
134	1	46.11	4.43724	5.8213	20.2769	9.1			9.1	3.5			3.5	31.85	Stolephorus commersonnii		20.2769	31.85		46.11	31.85		20.2769	3.5			20.2769	9.1
79	8	26.79	3.08	3.51	8.48648	4.1	3.2	4.5	3.93333	1.5	1.4	2.2	1.7	6.68667	Thryssa setirostris		8.48648	6.68667		26.79	6.68667		8.48648	1.7			8.48648	3.93333
102	21	29.1	2.96	3.65	8.48114	4.5	3.8		4.15	2.1	1.9		2	8.3	Thryssa setirostris		8.48114	8.3		29.1	8.3		8.48114	2			8.48114	4.15
37	26	23	3	3.3	7.7715	5.6	5.2	5.6	5.46667	1.1	1.1	1.2	1.13333	6.19556	Trichiurus lepturus		7.7715	6.19556		23	6.19556		7.7715	1.13333			7.7715	5.46667
44	18	24.1	2.5	3.5	6.86875	9.2			9.2	2.1	1.8		1.95	17.94	Trichiurus lepturus		6.86875	17.94		24.1	17.94		6.86875	1.95			6.86875	9.2
63	31	25.3	2.5	3.2	6.28	19.4			19.4	1.1			1.1	21.34	Trichiurus lepturus		6.28	21.34		25.3	21.34		6.28	1.1			6.28	9.4
69	16	25.9	2.8	3.7	8.1326	8.9			8.9	1.4			1.4	12.46	Trichiurus lepturus		8.1326	12.46		25.9	12.46		8.1326	1.4			8.1326	8.9
76		26.3373																				SUMMARY OUTPUT
		5.40062
	max	46.11			20.2769																	Regression Statistics
	min	13.6			1.29525																	Multiple R	0.511774
																						R Square	0.261912
																						Adjusted R Square	0.251938
																						Standard Error	3.00996
																						Observations	76
																						ANOVA
																							df	SS	MS
																						Regression	1	237.904	237.904
																						Residual	74	670.432	9.05989
																						Total	75	908.336
																							Coefficients	Standard Error	t Stat	Upper 95%	Lower 95.0%	Upper 95.0%
																						Intercept	3.46572	0.911624	3.8017	5.28217	1.64927	5.28217
																						X Variable 1	3.12739	0.610299	5.12436	4.34344	1.91134	4.34344

## Sheet: mouth and squid
N0	No sample	Standard Length (CM)	Vertical Mouth (CM)	Horizontal Mouth (CM)	mouth area	PL1	PL2	PL3	Average Length	PH1	PH2	PH3	Average Height	prey dimension	prey name		mouth area	prey dimension		Standard Length (CM)	prey dimension		mouth area	Average Height		mouth area	Average Length
15	98	16.5045	1.4	1.8	1.9782	3.1			3.1	1.2			1.2	3.72	squid		1.9782	3.72		16.5045	3.72		1.9782	1.2		1.9782	3.1
20	46	18.5526	1.55	1.9	2.31182	3			3	1.35			1.35	4.05	squid		2.31182	4.05		18.5526	4.05		2.31182	1.35		2.31182	3
22	31	19.3444	1.9	2.35	3.50502	4.2			4.2	1.6			1.6	6.72	squid		3.50502	6.72		19.3444	6.72		3.50502	1.6		3.50502	4.2
24	19	19.5283	2.1	2.6	4.2861	4.5			4.5	2			2	9	squid		4.2861	9		19.5283	9		4.2861	2		4.2861	4.5
26	145	19.56	1.35	1.8	1.90755	2.8			2.8	1.15			1.15	3.22	squid		1.90755	3.22		19.56	3.22		1.90755	1.15		1.90755	2.8
31	7	20.45	2.1	2.81	4.63229	6.5			6.5	1.82			1.82	11.83	squid		4.63229	11.83		20.45	11.83		4.63229	1.82		4.63229	6.5
64	30	25.4	3	3.4	8.007	5.6			5.6	2.6			2.6	14.56	squid		8.007	14.56		25.4	14.56		8.007	2.6		8.007	5.6
73	15	26.2	2.4	3.4	6.4056	7.6	4.2		5.9	2.6	1.8		2.2	12.98	squid		6.4056	12.98		26.2	12.98		6.4056	2.2		6.4056	5.9
76	4	26.34	2.45	3.1	5.96208	3			3	1.3			1.3	3.9	squid		5.96208	3.9		26.34	3.9		5.96208	1.3		5.96208	3
77	7	26.6002	3.15	3.4	8.40735	2.2			2.2	0.6			0.6	1.32	squid		8.40735	1.32		26.6002	1.32	Significance F	8.40735	0.6		8.40735	2.2
78	23	26.78	3	3.6	8.478	3			3	1			1	3	squid		8.478	3		26.78	3	0.000634824	8.478	1		8.478	3
85	8	27.4	3.8	4	11.932	7.9			7.9	2.6			2.6	20.54	squid		11.932	20.54		27.4	20.54		11.932	2.6		11.932	7.9
89	7	27.69	3	3.6	8.478	3.1			3.1	1.1			1.1	3.41	squid		8.478	3.41		27.69	3.41		8.478	1.1		8.478	3.1
92	2	28.03	2.5	3.2	6.28	3.2			3.2	1.5			1.5	4.8	squid		6.28	4.8		28.03	4.8		6.28	1.5		6.28	3.2
95	8	28.33	2.74	3.52	7.57117	2.4			2.4	0.8			0.8	1.92	squid		7.57117	1.92		28.33	1.92	Lower 95%	7.57117	0.8		7.57117	2.4
96	6	28.46	3.7	4.1	11.9085	5.23			5.23	1.9			1.9	9.937	squid		11.9085	9.937		28.46	9.937	19.8	11.9085	1.9		11.9085	5.23
97	49	28.5278	2.62	3.21	6.60201	4.32			4.32	1.8			1.8	7.776	squid		6.60201	7.776		28.5278	7.776	0.255787	6.60201	1.8		6.60201	4.32
101	11	29.04	2.85	3.54	7.91987	2.5			2.5	1			1	2.5	squid		7.91987	2.5		29.04	2.5		7.91987	1		7.91987	2.5
103	5	29.23	3	4.1	9.6555	4.5			4.5	1.3			1.3	5.85	squid		9.6555	5.85		29.23	5.85		9.6555	1.3		9.6555	4.5
110	26	30.6733	3.25	3.72	9.49065	3.4			3.4	1.2			1.2	4.08	squid		9.49065	4.08		30.6733	4.08		9.49065	1.2		9.49065	3.4
116	17	32.12	3.48104	4.34251	11.8664	5.2			5.2	1.7			1.7	8.84	squid		11.8664	8.84		32.12	8.84		11.8664	1.7		11.8664	5.2
117	10	32.34	3.25	3.76	9.5927	5.2			5.2	1.13			1.13	5.876	squid		9.5927	5.876		32.34	5.876		9.5927	1.13		9.5927	5.2
122	21	33.5337	4	4.96	15.5744	8.92	7.58		8.25	3.2	2.51		2.855	23.5538	squid		15.5744	23.5538		33.5337	23.5538		15.5744	2.855		15.5744	8.25
126	6	35.4152	3.51	4.32	11.9031	7.12			7.12	2.86			2.86	20.3632	squid		11.9031	20.3632		35.4152	20.3632		11.9031	2.86		11.9031	7.12
127	8	35.9886	4.22	5.82	19.2799	7.3			7.3	2.8			2.8	20.44	squid		19.2799	20.44		35.9886	20.44		19.2799	2.8		19.2799	7.3
129	51	39.363	3.82	4.71	14.1239	6.1			6.1	2			2	12.2	squid		14.1239	12.2		39.363	12.2		14.1239	2		14.1239	6.1
130	15	39.86	3.98125	5.11609	15.9892	7.2	5.2		6.2	2.4	2.2		2.3	14.26	squid		15.9892	14.26		39.86	14.26		15.9892	2.3		15.9892	6.2
132	5	40.28	3.98882	5.12781	16.0564	7.8	4.5		6.15	2.85	2		2.425	14.9138	squid		16.0564	14.9138		40.28	14.9138		16.0564	2.425		16.0564	6.15
133	42	44.3184	4.52	5.55	19.6925	9.2			9.2	3.5			3.5	32.2	squid		19.6925	32.2		44.3184	32.2		19.6925	3.5		19.6925	9.2
		28.8228																				SUMMARY OUTPUT
		7.00967																								SUMMARY OUTPUT
																						Regression Statistics
																						Multiple R	0.650898			Regression Statistics
																						R Square	0.423669			Multiple R	0.715576
																						Adjusted R Square	0.402323			R Square	0.512049
																						Standard Error	3.78233			Adjusted R Square	0.493976
																						Observations	29			Standard Error	3.48026
																										Observations	29
																						ANOVA
																							df	SS	MS	ANOVA
																						Regression	1	283.947	283.947		df	SS	MS	F	Significance F
																						Residual	27	386.263	14.306	Regression	1	343.18	343.18	28.3334	1.2804e-05
																						Total	28	670.21		Residual	27	327.03	12.1122
																										Total	28	670.21
																							Coefficients	Standard Error	t Stat
																						Intercept	1.5449	1.87777	0.822733		Coefficients	Standard Error	t Stat	P-value	Lower 95%	Upper 95%	Lower 95.0%	Upper 95.0%
																						X Variable 1	4.36121	0.978923	4.45511	Intercept	0.538272	1.76895	0.304289	0.763241	-3.09131	4.16786	-3.09131	4.16786
																										X Variable 1	1.80185	0.338509	5.32291	1.2804e-05	1.10729	2.49641	1.10729	2.49641

## Sheet: mouth and shrimp
N0	No sample	Standard Length (CM)	Vertical Mouth (CM)	Horizontal Mouth (CM)	mouth area	PL1	PL2	PL3	Average Length	PH1	PH2	PH3	Average Height	prey dimension	prey name		mouth area	prey dimension		Standard Length (CM)	prey dimension	mouth area	Average Height		mouth area	Average Length
1	49	5.90095	0.5	0.3	0.11775	1.4			1.4	0.2			0.2	0.28	shrimp		0.11775	0.28		5.90095	0.28	0.11775	0.2		0.11775	1.4
2	47	6.18044	0.5	0.3	0.11775	3.2			3.2	0.2			0.2	0.64	shrimp		0.11775	0.64		6.18044	0.64	0.11775	0.2		0.11775	3.2
3	36	7.07483	0.8	0.45	0.2826	1.3			1.3	0.2			0.2	0.26	shrimp		0.2826	0.26		7.07483	0.26	0.2826	0.2		0.2826	1.3
6	37	7.61912	0.7	0.3	0.16485	4.9			4.9	0.5			0.5	2.45	shrimp		0.16485	2.45		7.61912	2.45	0.16485	0.5		0.16485	4.9
7	1	8.1497	0.72	0.61	0.344772	2.5			2.5	0.8			0.8	2	shrimp		0.344772	2		8.1497	2	0.344772	0.8		0.344772	2.5
8	21	9.38951	1.37	0.98	1.05394	4.1	3.8	4	3.96667	0.5	0.3	0.42	0.406667	1.61311	shrimp		1.05394	1.61311		9.38951	1.61311	1.05394	0.406667		1.05394	3.96667
9	7	13.1	1.1	1.4	1.2089	6.7			6.7	1.2			1.2	8.04	shrimp		1.2089	8.04		13.1	8.04	1.2089	1.2		1.2089	6.7
11	5	13.9	1.3	1.5	1.53075	3.2			3.2	0.5			0.5	1.6	shrimp		1.53075	1.6		13.9	1.6	1.53075	0.5		1.53075	3.2
12	8	14.2	1.4	1.8	1.9782	3.2			3.2	0.6			0.6	1.92	shrimp		1.9782	1.92		14.2	1.92	1.9782	0.6		1.9782	3.2
13	10	14.9	1.5	2.2	2.5905	4.1	3.2		3.65	0.6	0.4		0.5	1.825	shrimp		2.5905	1.825		14.9	1.825	2.5905	0.5		2.5905	3.65
16	3	16.6	1.6	2	2.512	5.2	3.7	2.4	3.76667	0.7	0.5	0.3	0.5	1.88333	shrimp		2.512	1.88333		16.6	1.88333	2.512	0.5		2.512	3.76667
29	20	20.11	1.9	2.23	3.32605	3.6			3.6	0.33			0.33	1.188	shrimp		3.32605	1.188		20.11	1.188	3.32605	0.33		3.32605	3.6
32	12	20.67	2.12	3.2	5.32544	2.82			2.82	0.48			0.48	1.3536	shrimp		5.32544	1.3536		20.67	1.3536	5.32544	0.48		5.32544	2.82
38	3	23.06	3.01	3.46	8.17546	3.1			3.1	0.72			0.72	2.232	shrimp		8.17546	2.232		23.06	2.232	8.17546	0.72		8.17546	3.1
42	19	24	2.4	3.4	6.4056	6.5			6.5	1.3			1.3	8.45	shrimp		6.4056	8.45	Upper 95.0%	24	8.45	6.4056	1.3		6.4056	6.5
50	11	24.65	2.86	3.68	8.26197	10.5			10.5	2.1			2.1	22.05	shrimp		8.26197	22.05	4.66212	24.65	22.05	8.26197	2.1		8.26197	10.5
53	24	24.8	2.7	3.2	6.7824	4.5	4.2		4.35	1.3	1.1		1.2	5.22	shrimp		6.7824	5.22	0.574633	24.8	5.22	6.7824	1.2		6.7824	4.35
65	17	25.6	2.1	3.2	5.2752	3.2	3		3.1	0.6	0.4		0.5	1.55	shrimp		5.2752	1.55		25.6	1.55	5.2752	0.5		5.2752	3.1
70	15	26.01	3.12	3.54	8.67017	10.22			10.22	1.64			1.64	16.7608	shrimp		8.67017	16.7608		26.01	16.7608	8.67017	1.64		8.67017	10.22
80	11	26.9	2.8	3.5	7.693	7.8	5.2		6.5	1.3	1.2		1.25	8.125	shrimp		7.693	8.125		26.9	8.125	7.693	1.25		7.693	6.5
81	13	27.1	3.11	4.23	10.3269	7.8			7.8	1.3			1.3	10.14	shrimp		10.3269	10.14		27.1	10.14	10.3269	1.3		10.3269	7.8
88	16	27.68	3.1	3.84	9.34464	10.88			10.88	1.6			1.6	17.408	shrimp		9.34464	17.408		27.68	17.408	9.34464	1.6		9.34464	10.88
94	11	28.22	2.96	3.52	8.17907	3			3	0.5			0.5	1.5	shrimp		8.17907	1.5		28.22	1.5	8.17907	0.5		8.17907	3
112	6	31.5461	3.3	3.8	9.8439	10.32	5.2	4.32	6.61333	1.62	0.98	0.72	1.10667	7.31876	shrimp		9.8439	7.31876		31.5461	7.31876	9.8439	1.10667		9.8439	6.61333
114	7	32.1	3.9	5.1	15.6136	8.9			8.9	3.2			3.2	28.48	shrimp		15.6136	28.48		32.1	28.48	15.6136	3.2		15.6136	8.9
125	34	35.3942	3.51	4.42	12.1786	8.12			8.12	0.5			0.5	4.06	shrimp		12.1786	8.12		35.3942	8.12	12.1786	0.5		12.1786	8.12
		19.8021																						SUMMARY OUTPUT
		8.9384

## Sheet: food for threadfin
N0	No sample	nos	size class	Standard Length (CM)	Total Weigth (GR)	Gonad Stage	Sex	Habitat	Month	Replicate	Fullness Index	Feneropenaeus merguensis	Ambassis marianus	Trichiurus lepturus	Shrimp larvae	Loligo chinensis	Encrasicholina devisi	Corbula fortisulcata	Atherinomorus lacunosus	Stolephorus commersonnii	Dussumieria elopsoides	Thryssa setirostris	Macroplastic	Zooplankton	Odontodactylus scyllarus	Mugil cephalus	Leiognathus equulus	Hilsa kelee	Eleutheronema tetradactylum	Perinereis nuntia	Acetes sibogae	UDF	Fish digest	Fish bone	TOTAL FOOD ITEM	TOTAL NUMBER	Feneropenaeus merguensis	Ambassis marianus	Trichiurus lepturus	Shrimp larvae	Loligo chinensis	Encrasicholina devisi	Corbula fortisulcata	Atherinomorus lacunosus	Stolephorus commersonnii	Dussumieria elopsoides	Thryssa setirostris	Macroplastic	Zooplankton
1	57	1	1	2.08301	2.1	1	1	9	8	2	2																				2				2	1
2	51	2	1	2.25257	1.48	1	1	9	8	2	1																						1		1	1
3	58	3	1	2.4969	2.41	1	1	9	8	2	2																				1				1	1
4	53	4	1	2.54442	2.29	1	1	9	8	2	1																			1					1	1
5	67	5	1	2.55896	1.61	1	1	9	8	2	2																				1				1	1	100
6	56	6	1	2.66514	2.8	1	1	9	8	2	1																				1				1	1
7	69	7	1	2.70431	2.15	1	1	9	8	2	3																						1		1	1
8	60	8	1	3.1217	2.96	1	1	9	8	2	2																						1		1	1
9	55	9	1	3.14581	3.47	1	1	9	8	2	1																				1				1	1	100
10	68	10	1	3.33468	2.5	1	1	9	8	2	5																			2					2	1
11	65	11	1	3.62261	2.92	1	1	9	8	2	2																				1				1	1	100
12	70	12	1	3.7118	3.11	1	1	9	8	2	3																				1				1	1	100
13	63	13	1	4.08279	4.74	1	1	9	8	2	5																						1		1	1
14	62	14	1	4.371	4.76	1	1	9	8	2	4																				1				1	1	100
15	66	15	1	4.68899	5.29	1	1	9	8	2	2																					1			1	1
16	19	16	1	4.77015	2.98	1	1	9	8	1	1																						1		1	1
17	37	17	1	4.94146	2.12	1	1	9	8	1	2				2																				2	1				100
18	14	18	1	5.22587	2.6	1	1	9	8	1	1																				1				1	1	100
19	12	19	1	5.32848	2.3	1	1	9	8	1	2																				1		1		2	2	50
20	20	20	1	5.45356	3.01	1	1	9	8	1	2																						1		1	1
21	11	21	1	5.62495	2.37	1	1	9	9	1	4																				2		1		3	2
22	14	22	1	5.73818	2.87	1	1	9	8	1	1																				2				2	1
23	36	23	1	5.78287	3.12	1	1	9	8	1	3													1										2	3	2													5
24	13	24	1	5.86303	3.08	1	1	9	9	1	2													1											1	1													100
25	49	25	1	5.90095	2.99	1	1	9	8	2	2																				1				1	1	100
26	15	26	1	5.94387	3.5	1	1	9	8	1	1																						1		1	1
27	17	27	1	5.95993	3.02	1	1	9	9	1	2																				1		1		2	2	50
28	45	28	1	5.96464	3.23	1	1	9	8	1	1																						1		1	1
29	6	29	1	5.98704	3.31	1	1	9	8	1	2																				2				2	1
30	19	30	1	6.06746	3.33	1	1	9	8	1	1																				1				1	1	100
31	20	31	1	6.12406	3.18	1	1	9	9	1	2																						1		1	1
32	47	32	1	6.18044	3.4	1	1	9	8	2	3																				2				2	1	100
33	10	33	1	6.2037	3.7	1	1	9	8	1	3																				1				1	1	100
34	47	34	1	6.25514	3.91	1	1	9	8	1	2																				2				2	1	60
35	28	35	1	6.34518	5.07	1	1	9	8	1	1																						1		1	1
36	10	36	1	6.40591	3.36	1	1	9	9	1	1													2											2	1													100
37	33	37	1	6.42003	4.07	1	1	9	8	1	4																				2				2	1	100
38	50	38	1	6.48905	4.07	1	1	9	8	1	1																			1					1	1
39	7	39	1	6.50121	3.95	1	1	9	8	1	3				2																				2	1				100
40	8	40	1	6.57191	3.07	1	1	9	9	1	2																						1		1	1
41	25	41	1	6.58004	4.19	1	1	9	8	1	2																							2	2	1
42	28	42	1	6.63749	4.38	1	1	9	8	1	2												1								2				3	2												5
43	46	43	1	6.63828	4.91	1	1	9	8	1	1																				1				1	1	100
44	21	44	1	6.64376	3.92	1	1	9	8	1	4																			1				2	3	2
45	4	45	1	6.70104	4.27	1	1	9	8	1	2																						1		1	1
46	22	46	1	6.73063	4.13	1	1	9	8	1	2																				1				1	1	100
47	44	47	1	6.7523	4.78	1	1	9	8	1	3																					1			1	1
48	16	48	1	6.76692	5.52	1	1	9	8	1	2																			1					1	1
49	4	49	1	6.77165	3.92	1	1	9	8	1	1																					1			1	1
50	31	50	1	6.77243	5.55	1	1	9	8	1	1																					1			1	1
51	46	51	1	6.83237	5.58	1	1	9	8	2	2																			2					2	1
52	2	52	1	6.83246	3.64	1	1	9	9	1	2																				1				1	1
53	15	53	1	6.85071	4.62	1	1	9	9	1	3																				1				1	1
54	7	54	1	6.87751	4.68	1	1	9	9	1	3													1							1				2	2	20												80
55	3	55	1	6.92059	4.15	1	1	9	9	1	6																				2				2	1	100
56	1	56	1	6.98909	4.43	1	1	9	9	1	4																						1		1	1
57	33	57	1	7.04213	5.72	1	1	9	8	1	1																				1				1	1	100
58	36	58	1	7.07483	5.94	1	1	9	8	1	4																				2				2	1	100
59	38	59	1	7.12588	5.3	1	1	9	8	1	1																						1		1	1
60	25	60	1	7.17649	6.91	1	1	9	8	1	6																				1				1	1
61	30	61	1	7.21626	7.28	1	1	9	8	1	1																						1		1	1
62	29	62	1	7.21737	6.83	1	1	9	8	1	1																						1		1	1
63	43	63	1	7.23609	5.9	1	1	9	8	2	3																					1			1	1
64	42	64	1	7.30794	5.91	1	1	9	8	1	2													1								1			2	2													3
65	32	65	1	7.38166	6.14	1	1	9	8	1	1																						1		1	1
66	5	66	1	7.42998	5.75	1	1	9	8	1	3																				3				3	1
67	42	67	1	7.45503	5.97	1	1	9	8	2	1																						1		1	1
68	24	68	1	7.52383	5.44	1	1	9	8	1	4																			2					2	1
69	26	69	1	7.55879	8.36	1	1	9	8	1	5																				2				2	1
70	11	70	1	7.59737	6.82	1	1	9	8	1	6																			3					3	1
71	37	71	1	7.61912	6.48	1	1	9	8	1	6																				1				1	1	100
72	26	72	1	7.62378	6.29	1	1	9	8	1	5																			1	2				3	2
73	13	73	1	7.63326	7.26	1	1	9	8	1	2																				2				2	1	100
74	41	74	1	7.70186	5.79	1	1	9	8	1	1																					1			1	1
75	35	75	1	7.72176	7.13	1	1	9	8	1	2																						1		1	1
76	38	76	1	7.75697	6.84	1	1	9	8	1	5																				2				2	1	100
77	34	77	1	7.82786	8.13	1	1	9	8	1	2																				2				2	1	100
78	8	78	1	7.85576	5.73	1	1	9	8	1	2																				1				1	1	100
79	24	79	1	7.92038	5.36	1	1	9	8	1	1																							2	2	1
80	31	80	1	8.02721	7.7	1	1	9	8	1	2																				1				1	1	100
81	41	81	1	8.12921	8.32	1	1	9	8	1	3													2						1					3	2													10
82	23	82	1	8.13058	9.3	1	1	9	8	1	3																				1				1	1	100
83	1	83	1	8.1497	7.49	1	1	9	8	1	6																				1				1	1	100
84	27	84	1	8.24463	7.99	1	1	9	8	1	4																				1				1	1	100
85	27	85	1	8.34751	7.65	1	1	9	8	1	4													2									1		3	2													5
86	1	86	1	8.4053	8.62	1	1	9	8	1	5												1								3				4	2	97											3
87	2	87	1	8.89772	7.96	1	1	9	8	1	5																				1				1	1	100
88	21	88	1	9.38951	43	1	1	9	8	1	6																				4				4	1	100
89	22	89	1	11.9021	18.43	1	1	9	8	1	5																				2				2	1	100
90	4	90	1	11.96	36.86	1	1	4	3	2	6																				2				2	1	100
91	7	1	2	13.1	44.14	1	1	4	2	2	6	1																							1	1	100
92	6	2	2	13.6	42.56	1	1	4	2	2	6		2																						2	1		100
93	3	3	2	13.71	45.7	1	1	4	3	2	6	2																							2	1	100
94	5	4	2	13.9	47.06	1	1	4	2	1	4	1																							1	1	100
95	8	5	2	14.2	50.14	1	1	4	2	3	4	1																							1	1	100
96	4	6	2	14.3	49.32	1	1	4	2	1	3	2																							2	1	100
97	10	7	2	14.9	56.63	1	1	4	2	3	6	3																							3	1	100
98	9	8	2	14.9496	87.68	1	1	2	11	1	2																					1			1	1
99	9	9	2	15.3	61.08	1	1	4	2	3	6								1																1	1								100
100	92	10	2	15.8868	67.74	1	1	10	11	1	2																							2	2	1
101	136	11	2	16.0165	103.98	1	1	10	11	1	3	1																							1	1	100
102	184	12	2	16.1931	65.32	1	1	10	11	1	2																					1			1	1
103	126	13	2	16.2586	76.4	1	1	10	11	1	2																						2		2	1
104	185	14	2	16.281	82.88	1	1	10	11	1	2																					1			1	1
105	177	15	2	16.33	95.64	1	1	10	11	1	2																				1				1	1
106	108	16	2	16.3335	103.67	1	1	10	11	1	4	1																							1	1	100
107	161	17	2	16.3836	75.36	1	1	10	11	1	1													1										1	2	2													30
108	137	18	2	16.485	107.97	1	1	10	11	1	2																				3				3	1
109	98	19	2	16.5045	98.11	1	1	10	11	1	3					1																			1	1					100
110	196	20	2	16.52	88.63	1	1	10	11	1	3																				2				2	1
111	79	21	2	16.5616	69.68	1	1	10	11	1	2	1																							1	1	100
112	3	22	2	16.6	88.71	1	1	4	2	1	6	13																							13	1	100
113	1	23	2	16.65	86.87	1	1	4	3	1	3	1																							1	1	100
114	93	24	2	16.6955	67.61	1	1	10	11	1	1																							2	2	1
115	107	25	2	16.7385	99.79	1	1	10	11	1	3	1																							1	1	100
116	128	26	2	16.7836	83.2	1	1	10	11	1	1													1											1	1													100
117	153	27	2	16.85	94.45	1	1	10	11	1	2																				2				2	1
118	197	28	2	16.85	72.12	1	1	10	11	1	3																				1		1		2	2
119	147	29	2	16.9384	95.42	1	1	10	11	1	2	1																							1	1	100
120	23	30	2	17	85.01	1	1	10	11	1	1													1											1	1													100
121	183	31	2	17.05	98.11	1	1	10	11	1	1													2											2	1													100
122	191	32	2	17.08	85.14	1	1	10	11	1	1																						1		1	1
123	66	33	2	17.0823	147.63	1	1	10	11	1	1	1																							1	1	100
124	164	34	2	17.09	100.36	1	1	10	11	1	4																					1			1	1
125	109	35	2	17.1331	110.04	1	1	10	11	1	1																							1	1	1
126	121	36	2	17.1907	80.73	1	1	10	11	1	1																						1		1	1
127	106	37	2	17.2633	102.4	1	1	10	11	1	4																							2	2	1
128	1	38	2	17.3	87.98	1	1	4	2	1	6	1																							1	1	100
129	162	39	2	17.36	90.34	1	1	10	11	1	1	1																							1	1	100
130	199	40	2	17.36	100.58	1	1	10	11	1	1	1																							1	1	100
131	124	41	2	17.4827	86.74	1	1	10	11	1	1												1											1	2	2												20
132	104	42	2	17.5303	110.1	2	1	10	11	1	4									1															1	1									100
133	144	43	2	17.55	89.45	1	1	10	11	1	1	1																							1	1	100
134	187	44	2	17.65	105.66	1	1	10	11	1	1																							1	1	1
135	97	45	2	17.679	67.62	1	1	10	11	1	2	1																							1	1	100
136	91	46	2	17.6807	92.05	1	1	10	11	1	2	1																							1	1	100
137	167	47	2	17.7411	105.36	1	1	10	11	1	2	1																							1	1	100
138	95	48	2	17.7425	104.81	1	1	10	11	1	1																							1	1	1
139	78	49	2	17.7873	108.09	1	1	10	11	1	3																							2	2	1
140	148	50	2	17.85	124.36	1	1	10	11	1	1																						1		1	1
141	192	51	2	17.85	100.63	1	1	10	11	1	3																						2		2	1
142	86	52	2	17.8599	98.9	1	1	10	11	1	1	1																							1	1	100
143	172	53	2	17.86	125.43	1	1	10	11	1	3																				1		1		2	2
144	135	54	2	17.8789	129.12	2	1	10	11	1	1				2																				2	1				100
145	57	55	2	17.9007	105.62	1	1	10	11	1	3																					1			1	1
146	17	56	2	17.9067	105.14	1	1	10	11	1	3							1																	1	1							100
147	156	57	2	17.9396	110.36	1	1	10	11	1	1	1																							1	1	100
148	130	58	2	17.9505	104.13	2	1	10	11	1	3													1										1	2	2													10
149	90	59	2	18.0221	105.13	1	1	10	11	1	1																						1		1	1
150	99	60	2	18.0515	75.2	1	1	10	11	1	3	1																							1	1	100
151	160	61	2	18.06	104.28	1	1	10	11	1	2									1															1	1									100
152	182	62	2	18.09	115.06	1	1	10	11	1	5	1																							1	1	100
153	198	63	2	18.0994	110.63	1	1	10	11	1	1	1																							1	1	100
154	132	64	2	18.1822	130.03	2	1	10	11	1	2	1																						1	2	2	50
155	105	65	2	18.1964	127.63	2	1	10	11	1	3	1																							1	1	100
156	154	66	2	18.2434	100.11	1	1	10	11	1	2									1															1	1									100
157	14	67	2	18.35	132.12	1	1	5	11	1	1																				2				2	1
158	119	68	2	18.4075	135.68	1	1	10	11	1	2	1																							1	1	100
159	94	69	2	18.4207	78.73	1	1	10	11	1	2																				2				2	1
160	131	70	2	18.4849	132.47	2	1	10	11	1	2																				2				2	1
161	68	71	2	18.5157	101.76	1	1	10	11	1	3	2																							2	1	100
162	129	72	2	18.536	109.01	2	1	10	11	1	1													2											2	1													100
163	46	73	2	18.5526	91.85	1	1	10	11	1	2					1																			1	1					100
164	141	74	2	18.5859	120.45	1	1	10	11	1	1																					1			1	1
165	29	75	2	18.5886	110.42	2	1	10	11	1	1																							1	1	1
166	24	76	2	18.6216	107.34	1	1	10	10	1	3	1																					1		2	2	98
167	38	77	2	18.6374	104.11	1	1	10	11	1	1																						1		1	1
168	77	78	2	18.6457	114.78	1	1	10	11	1	3																						1		1	1
169	111	79	2	18.6869	126.53	1	1	10	11	1	1																					1			1	1
170	200	80	2	18.69	109.14	1	1	10	11	1	2																							2	2	1
171	179	81	2	18.7942	130.57	2	1	10	11	1	2	1																							1	1	100
172	29	82	2	18.8155	114.91	2	1	10	10	1	2																						1		1	1
173	116	83	2	18.8226	137.08	1	1	10	11	1	1																						1		1	1
174	142	84	2	18.8301	135.78	1	1	10	11	1	2																							3	3	1
175	34	85	2	18.8718	110.14	2	1	10	11	1	1													2											2	1													100
176	110	86	2	18.93	130.62	1	1	10	11	1	2	2																							2	1	100
177	49	87	2	18.9478	91.39	1	1	10	11	1	1																							2	2	1
178	19	88	2	18.9978	118.32	1	1	10	10	1	3	1																							1	1	100
179	75	89	2	19.0139	137.04	1	1	10	11	1	2				2																				2	1				100
180	87	90	2	19.029	121.28	1	1	10	11	1	1																						1		1	1
181	32	91	2	19.0488	106.08	2	1	10	11	1	3	1																							1	1	100
182	53	92	2	19.057	152.16	3	1	10	11	1	1	1																							1	1	100
183	168	93	2	19.08	110.41	1	1	10	11	1	1	1																							1	1	100
184	113	94	2	19.1018	138.56	2	1	10	11	1	2	1																							1	1	100
185	30	95	2	19.11	138.92	2	1	5	5	1	5									1													2		3	2									85
186	20	96	2	19.1197	113.08	1	1	10	11	1	1												1												1	1												100
187	149	97	2	19.1203	128.13	2	1	10	11	1	4												1								2				3	2												20
188	25	98	2	19.1494	119.63	2	1	10	10	1	3	1																							1	1	100
189	112	99	2	19.1668	140.65	2	1	10	11	1	1																							2	2	1
190	83	100	2	19.2182	114.1	1	1	10	11	1	3													2									1		3	2													5
191	52	101	2	19.3019	147.72	2	1	10	11	1	3	1																							1	1	100
192	31	102	2	19.3444	118.1	2	1	10	11	1	2					1																			1	1					100
193	22	103	2	19.3689	123.12	2	1	10	10	1	2	1																							1	1	100
194	76	104	2	19.3831	126.94	1	1	10	11	1	1				2																				2	1				100
195	6	105	2	19.3877	224.74	2	1	3	11	1	1																							2	2	1
196	36	106	2	19.4616	107.32	1	1	10	11	1	2	1																							1	1	100
197	25	107	2	19.52	128.73	3	1	5	5	1	3						1																		1	1						100
198	19	108	2	19.5283	132.88	2	1	10	11	1	3					1																			1	1					100
199	170	109	2	19.5369	120.78	1	1	10	11	1	2																				2	1			3	2
200	69	110	2	19.5457	98.77	1	1	10	11	1	2								1				2												3	2								97				3
201	145	111	2	19.56	118.72	1	1	10	11	1	4					1																			1	1					100
202	2	112	2	19.64	140.85	1	1	5	6	1	3																				2				2	1
203	120	113	2	19.6804	136.64	1	1	10	11	1	1																				2				2	1
204	12	114	2	19.7622	192.63	1	1	1	11	2	5																1								1	1
205	17	115	2	19.7965	132.62	1	1	10	10	1	4						4																		4	1						100
206	14	116	2	19.8159	139.24	1	1	10	11	1	5	1																							1	1	100
207	2	117	2	19.83	154.97	1	1	6	6	1	5	9																							9	1	100
208	45	118	2	19.8711	122.07	1	1	10	11	1	1																							1	1	1
209	84	119	2	20.0454	142.59	2	1	10	11	1	1																						1		1	1
210	21	120	2	20.07	156.14	1	1	6	6	1	4	3																							3	1	100
211	13	121	2	20.07	130.14	1	1	5	11	1	1																						1		1	1
212	20	122	2	20.11	138.27	1	1	5	5	1	4	1																							1	1	100
213	26	123	2	20.2631	128.34	1	1	10	10	1	4	2																							2	1	100
214	18	124	2	20.3	149.72	1	1	5	5	1	2																						1		1	1
215	12	125	2	20.3335	142.49	3	1	10	11	1	1																							1	1	1
216	9	126	2	20.35	145.06	2	1	5	11	1	3																1								1	1
217	81	127	2	20.4353	130.08	1	1	10	11	1	4	1																							1	1	100
218	7	128	2	20.45	192.34	2	1	5	6	1	6	1				1																			2	2	5				95
219	33	129	2	20.4649	141.22	1	1	10	11	1	2	1																							1	1	100
220	59	130	2	20.47	154.64	2	1	10	11	1	1																							2	2	1
221	6	131	2	20.51	145.12	1	1	5	6	1	1	1																							1	1	100
222	7	132	2	20.6	141.11	1	1	3	5	1	4																							1	1	1
223	12	133	2	20.67	152.4	1	1	2	5	3	2	1																						2	3	2	40
224	13	134	2	20.7026	159.18	2	1	10	11	1	2																						1	1	2	2
225	12	135	2	20.7408	151.28	1	1	10	10	1	3	1																							1	1	100
226	37	136	2	20.7593	143.84	2	1	10	11	1	2																					1			1	1
227	85	137	2	20.8134	168.02	3	1	10	11	1	5	1																							1	1	100
228	22	138	2	20.8276	144.83	2	1	10	11	1	4	1																							1	1	100
229	26	139	2	21.13	169.43	2	1	5	5	1	3																						1	1	2	2
230	8	140	2	21.38	173.02	2	1	6	6	1	6	1																							1	1	100
231	5	141	2	21.4	212.34	1	1	5	6	1	3																2								2	1
232	7	142	2	21.42	171.4	1	1	6	6	1	6	2																							2	1	100
233	16	143	2	21.46	162.48	2	1	6	6	1	3					1																			1	1					100
234	11	144	2	21.5726	244.96	2	1	1	11	2	5	1																							1	1	100
235	11	145	2	21.6724	157.83	2	1	10	11	1	2																					1			1	1
236	15	146	2	21.75	169.88	2	1	6	6	1	3	2																							2	1	100
237	82	147	2	21.7604	191.98	2	1	10	11	1	3	1																							1	1	100
238	6	148	2	22.03	196.85	2	1	5	11	1	2																				2			1	3	2
239	10	149	2	22.0673	209.36	3	2	10	10	1	2																								0	0
240	2	150	2	22.1	209.41	5	2	5	6	1	3																							1	1	1
241	2	151	2	22.12	205.15	1	1	1	3	1	1																					1			1	1
242	27	152	2	22.1276	180.32	1	1	10	10	1	6	1																							1	1	100
243	4	153	2	22.16	215.97	1	1	3	4	1	4																						2		2	1
244	15	154	2	22.2509	183.93	1	1	10	10	1	6						5																		5	1						100
245	4	155	2	22.2648	181.04	1	1	10	11	1	4	1																							1	1	100
246	23	156	2	22.2857	189.1	3	1	10	10	1	4	1																							1	1	100
247	62	157	2	22.3665	192.23	1	1	10	11	1	3	1																							1	1	100
248	4	158	2	22.38	205.64	2	1	6	6	1	1																							2	2	1
249	3	159	2	22.45	222.4	2	1	1	9	1	1																						2		2	1
250	24	160	2	22.524	168.28	2	1	7	6	2	6																		1						1	1
251	3	161	2	22.5885	273.49	6	1	2	13	1	3																						2	2	4	2
252	15	162	2	22.75	298.58	2	1	5	11	1	1																					2			2	1
253	3	163	2	22.76	223.64	2	1	6	6	1	1	1																							1	1	100
254	10	164	2	22.78	310.95	1	1	5	3	1	3	1																							1	1	100
255	11	165	2	22.84	220.18	2	1	1	12	1	1	1																							1	1	100
256	20	166	2	22.8485	195.12	8	1	10	10	1	2	1																							1	1	100
257	1	167	2	22.93	264.14	1	1	5	6	1	3					1																			1	1					100
258	3	168	2	22.9363	210.79	2	1	10	11	1	2																				2				2	1
259	8	169	2	22.95	330.14	1	2	5	11	1	2	1																							1	1	100
260	29	170	2	22.96	400.21	5	2	5	5	1	5		1																					1	2	2		90
261	26	171	2	23	244	2	1	1	1	1	5			4																					4	1			100
262	72	172	2	23.0248	233.97	2	1	10	11	1	4					1																			1	1					100
263	3	173	2	23.06	256.11	3	1	1	5	3	2	1																							1	1	100
264	55	174	2	23.0873	242.93	3	1	10	11	1	3				3																		1		4	2				20
265	9	175	2	23.1605	202.56	1	1	10	11	1	4					1																			1	1					100
266	12	176	2	23.21	207.61	1	1	5	5	1	3																							1	1	1
267	4	177	2	23.24	227.63	8	1	5	6	1	1																						1		1	1
268	9	178	2	23.26	314.15	2	1	5	3	1	1																							2	2	1
269	5	179	2	23.3	214.33	1	1	1	2	1	6						1																		1	1						100
270	8	180	2	23.3083	208.39	3	1	10	11	1	3																				2				2	1
271	11	181	2	23.34	245.1	1	1	6	6	1	3	1																							1	1	100
272	44	182	2	23.3567	189.19	3	1	10	11	1	5	1																					2		3	2	95
273	14	183	2	23.37	193.35	2	1	6	6	1	2																							1	1	1
274	9	184	2	23.41	161.7	2	1	1	9	2	3																				2				2	1
275	7	185	2	23.45	150.15	1	1	3	9	2	2	1																					1		2	2	85
276	6	186	2	23.45	286.74	2	1	5	10	1	2					1																			1	1					100
277	7	187	2	23.4588	194.86	3	1	10	11	1	4									1															1	1									100
278	3	188	2	23.49	245.15	1	1	5	6	1	1	1																							1	1	100
279	9	189	2	23.5919	209.8	2	1	10	10	1	2																						1		1	1
280	19	190	2	23.61	227.42	2	1	5	5	1	1																						1		1	1
281	20	191	2	23.68	343.56	1	2	5	10	1	1	2																							2	1	100
282	26	192	2	23.7155	183.9	2	1	7	6	2	4	1																							1	1	100
283	22	193	2	23.86	340.3	2	2	5	10	1	1												1				1						1		3	3												5
284	51	194	2	23.8812	277.48	2	1	10	11	1	5	1											1												2	2	98											2
285	20	195	2	23.94	348.52	2	2	5	12	1	3	1																							1	1	100
286	21	196	2	23.9705	247.34	1	1	1	8	3	6																11								11	1
287	19	197	2	24	268	1	1	1	1	1	3	1																							1	1	100
288	74	198	2	24.0791	253.99	1	2	10	11	1	3	2																							2	1	100
289	19	199	2	24.09	348.56	5	2	5	10	1	2						1																	1	2	2						90
290	15	1	3	24.1	169.88	2	1	3	9	3	3					1																			1	1					100
291	18	2	3	24.1	275	1	1	1	1	1	5			2																					2	1			100
292	11	3	3	24.2998	292.88	3	2	2	8	1	3																							2	2	1
293	20	4	3	24.3172	279.77	4	2	1	8	3	5																7							1	8	2
294	6	5	3	24.33	297.41	2	1	5	2	1	2	1																							1	1	100
295	2	6	3	24.4038	296.88	1	1	10	10	1	6	2																							2	1	100
296	9	7	3	24.43	355.61	4	2	5	10	1	2					1		1																	2	2					98		2
297	9	8	3	24.45	239.28	2	1	7	6	1	3						1																		1	1						100
298	12	9	3	24.5	259	1	1	1	1	3	4		3		2																				5	2		95		5
299	6	10	3	24.5165	301.88	7	1	3	13	2	5	2																							2	1	100
300	24	11	3	24.56	339.32	5	2	5	5	1	6		1																				1	1	3	3		45
301	25	12	3	24.61	354.15	4	1	5	12	1	4									1														1	2	2									95
302	3	13	3	24.62	253.72	7	2	2	5	1	1																							1	1	1
303	5	14	3	24.63	285.94	1	1	5	2	1	3		1										1												2	2		97										3
304	2	15	3	24.65	358.16	5	2	1	9	1	4									2							1								3	2									60
305	11	16	3	24.65	287.64	2	1	5	5	1	6	1																							1	1	100
306	12	17	3	24.7282	256.13	2	1	1	9	1	4																					1			1	1
307	3	18	3	24.75	280.25	4	2	5	9	1	3																4								4	1
308	4	19	3	24.78	285.98	3	2	1	9	1	5	1															7								8	2	10
309	24	20	3	24.8	307	2	1	1	1	1	5	2																							2	1	100
310	2	21	3	24.8013	268.96	3	1	10	11	1	3									1															1	1									100
311	2	22	3	24.8478	392.87	6	1	2	13	2	1																							1	1	1
312	22	23	3	24.89	283.65	1	1	6	6	1	6															3									3	1
313	18	24	3	24.9988	298.47	3	2	3	8	2	5																10								10	1
314	25	25	3	25	296	1	1	1	1	1	6		4																						4	1		100
315	18	26	3	25.06	310.5	1	2	5	12	1	1																						2		2	1
316	23	27	3	25.1	256	2	1	1	1	1	1		1																						1	1		100
317	13	28	3	25.1	273.88	3	2	2	6	2	2							1																1	2	2							20
318	1	29	3	25.1	358.15	4	2	3	9	1	2	1	2																						3	2	30	70
319	1	30	3	25.1	278.15	1	1	3	2	1	5						1																		1	1						100
320	8	31	3	25.11	312.13	1	2	5	10	1	1	1																							1	1	100
321	6	32	3	25.16	305.68	4	1	1	4	1	6										2												1		3	2										80
322	17	33	3	25.18	330.14	2	1	5	10	1	1												1									1			2	2												5
323	6	34	3	25.19	320.14	2	1	5	4	1	4	2			1																				3	2	95			5
324	22	35	3	25.2	310	1	1	1	1	1	3		1										1												2	2		98										2
325	2	36	3	25.21	305.86	3	1	5	5	1	6									1															1	1									100
326	14	37	3	25.22	276.76	2	2	5	5	1	5														1										1	1
327	9	38	3	25.2787	285.55	8	1	2	8	1	4																							3	3	1
328	31	39	3	25.3	302	2	1	1	1	2	6			1																					1	1			100
329	5	40	3	25.3	276.42	6	2	2	5	1	6								1															1	2	2								95
330	30	41	3	25.4	281	3	1	1	1	2	6					1																			1	1					100
331	10	42	3	25.41	268.12	1	1	5	2	1	2	2																							2	1	100
332	14	43	3	25.45	245.78	3	1	1	9	3	2				3																				3	1				100
333	1	44	3	25.47	310.16	1	1	5	4	1	2							1														1			2	2							2
334	9	45	3	25.52	320.09	1	1	1	3	3	4																					2			2	1
335	8	46	3	25.5513	263.22	2	1	3	8	1	1																							1	1	1
336	17	47	3	25.6	308	1	1	1	1	1	2	2																							2	1	100
337	9	48	3	25.61	300.6	2	1	5	5	1	6		1							1														1	3	3		50							40
338	73	49	3	25.6247	330.63	2	2	10	11	1	2																				2				2	1
339	13	50	3	25.65	315.91	2	1	3	4	2	2																							2	2	1
340	4	51	3	25.65	310.15	2	1	5	6	1	2												2										1		3	2												5
341	1	52	3	25.6606	257.1	1	1	10	11	1	6						1																	2	3	2						97
342	5	53	3	25.6906	270.6	3	1	2	10	3	5	1																						1	2	2	90
343	19	54	3	25.7074	294.36	1	2	3	8	2	3																				2				2	1
344	23	55	3	25.73	280.14	2	1	5	10	1	2								1																1	1								100
345	14	56	3	25.76	300.15	4	1	1	12	1	2	1																							1	1	100
346	15	57	3	25.7949	282.1	2	1	1	9	3	5	1																							1	1	100
347	26	58	3	25.86	370.15	3	1	5	12	1	4																						1	2	3	2
348	21	59	3	25.87	298.36	6	2	5	12	1	2				3																				3	1				100
349	16	60	3	25.9	325	1	1	1	1	1	4			1																					1	1			100
350	54	61	3	25.9013	344.5	3	1	10	11	1	6	2											2												4	2	98											2
351	10	62	3	25.91	350.45	5	2	2	9	2	2	1																				2			3	2	40
352	10	63	3	25.94	445.13	3	2	5	11	1	2																				1		2		3	2
353	15	64	3	26.01	324.86	2	2	5	5	1	4	1																							1	1	100
354	21	65	3	26.0644	265.59	3	2	7	6	2	6	4																							4	1	100
355	7	66	3	26.07	402.18	3	1	5	10	1	2																							3	3	1
356	14	67	3	26.0751	348.81	4	2	1	8	2	6																8							3	11	2
357	9	68	3	26.1	333.87	2	3	1	2	2	1							1																	1	1							100
358	3	69	3	26.11	324.5	3	1	5	2	1	3		1																		1				2	2		95
359	12	70	3	26.11	310.87	3	2	2	6	2	3																						2		2	1
360	17	71	3	26.12	435.4	4	2	5	3	1	4	2																							2	1	100
361	8	72	3	26.12	309.85	2	1	2	6	1	4																							1	1	1
362	18	73	3	26.17	435.81	3	2	5	10	1	2									2															2	1									100
363	15	74	3	26.2	350	1	1	1	1	1	6					2																			2	1					100
364	11	75	3	26.21	307.11	8	1	2	3	2	6									1															1	1									100
365	11	76	3	26.2149	271.78	3	1	1	9	1	4						1																	2	3	2						90
366	4	77	3	26.34	298.45	1	1	5	2	1	1					1															2				3	2					95
367	4	78	3	26.4084	514.31	3	2	3	11	1	2	1																					1		2	2	40
368	71	79	3	26.42	316.1	2	2	10	11	1	2	1																							1	1	100
369	18	80	3	26.44	282.78	1	1	6	6	1	3																							2	2	1
370	5	81	3	26.45	330.75	4	2	2	9	1	1																						1	1	2	2
371	3	82	3	26.5	319	3	1	2	1	2	5	2																							2	1	100
372	13	83	3	26.54	309.65	3	1	5	5	1	2																						1		1	1
373	7	84	3	26.54	389.45	2	3	5	3	1	3																				2				2	1
374	10	85	3	26.55	334.51	4	2	2	12	1	1												2									1			3	2												2
375	7	86	3	26.6002	343.99	3	1	10	10	1	4					1																			1	1					100
376	9	87	3	26.66	315.86	2	2	5	2	1	1							1					1												2	2							50					50
377	11	88	3	26.75	332.42	2	2	5	11	1	1				2																				2	1				100
378	23	89	3	26.78	365.18	3	2	5	12	1	2					1																			1	1					100
379	8	90	3	26.79	332.7	4	1	1	4	1	6	1									1	2												1	5	4	5									40	50
380	8	91	3	26.8126	331.54	3	1	10	10	1	3	2																							2	1	100
381	4	92	3	26.83	346.11	5	2	2	5	1	5																							2	2	1
382	63	93	3	26.8514	298.42	3	1	10	11	1	4	1																							1	1	100
383	4	94	3	26.89	395.14	2	1	5	3	1	3	1			1																				2	2	95			5
384	4	95	3	26.8948	299.22	4	2	1	8	1	3																1								1	1
385	11	96	3	26.9	369	1	1	1	1	3	5	2																							2	1	100
386	3	97	3	26.91	385.75	3	2	5	11	1	1																							2	2	1
387	3	98	3	26.9168	326.94	1	1	3	10	2	3					1																			1	1					100
388	15	99	3	27	354.13	1	1	5	10	1	1																						3	1	4	2
389	2	100	3	27.08	310.18	3	1	5	2	1	2	1																							1	1	100
390	5	101	3	27.09	324.12	1	2	3	12	3	2													3											3	1													100
391	27	102	3	27.1	398.196	2	1	5	8	1	3	1																				1			2	2	60
392	13	103	3	27.1	337.68	8	1	3	5	2	6	1																							1	1	100
393	1	104	3	27.12	340.62	2	1	2	4	1	1																							1	1	1
394	5	105	3	27.13	487.35	2	2	5	3	1	3	1								1			1												3	3	40								55			5
395	2	106	3	27.13	343.34	2	1	5	10	1	3	3																							3	1	100
396	17	107	3	27.1324	358.24	5	1	2	8	2	5	2															5								7	2	25
397	4	108	3	27.1357	380.81	2	1	10	10	1	5	1																							1	1	100
398	25	109	3	27.14	382.92	3	1	5	10	1	1						1																		1	1						100
399	41	110	3	27.1714	275.92	2	1	10	11	1	5	2																							2	1	100
400	6	111	3	27.21	366.97	3	1	1	3	2	2																							2	2	1
401	31	112	3	27.24	362.45	4	2	5	12	1	4	2																							2	1	100
402	13	113	3	27.25	415.36	2	3	5	3	1	2																						1		1	1
403	16	114	3	27.27	452.14	4	2	5	10	1	1																						2		2	1
404	15	115	3	27.35	391.88	5	1	1	5	2	6									2															2	1									100
405	24	116	3	27.36	396.67	3	1	5	10	1	1																				4				4	1
406	3	117	3	27.38	425.14	4	1	5	4	1	1												1										1		2	2												3
407	15	118	3	27.38	356.14	4	2	2	12	2	2																							2	2	1
408	28	119	3	27.4	366.549	2	1	5	8	1	4				3												1					1			5	3				50
409	8	120	3	27.4	376.5	3	1	1	2	1	6					1																			1	1					100
410	2	121	3	27.4013	455.75	2	3	3	11	1	1																							1	1	1
411	16	122	3	27.45	370.52	4	2	1	12	1	3																				3				3	1
412	15	123	3	27.4597	337.56	7	2	7	6	2	4	2																							2	1	100
413	13	124	3	27.466	289.06	2	2	7	6	2	6																		1						1	1
414	14	125	3	27.49	348.19	2	2	5	10	1	2						1																	3	4	2						90
415	9	126	3	27.5	358.9	1	1	2	6	2	5	1																						1	2	2	40
416	11	127	3	27.51	353.95	2	1	2	6	2	6																						2		2	1
417	2	128	3	27.54	378.96	3	1	5	4	1	2						1																		1	1						100
418	13	129	3	27.54	465.89	3	2	5	10	1	6	5																							5	1	100
419	25	130	3	27.61	382.68	1	1	3	4	3	3																						1	2	3	2
420	16	131	3	27.68	410.48	5	2	5	5	1	6	1																							1	1	100
421	7	132	3	27.69	368.41	6	1	2	12	1	5					1																			1	1					100
422	4	133	3	27.78	375.85	1	1	2	3	1	1																					1			1	1
423	3	134	3	27.81	375.11	1	2	5	10	1	3									2														2	4	2									90
424	29	135	3	27.82	445.238	2	1	5	8	1	2	1																							1	1	100
425	15	136	3	27.96	418.64	2	1	2	4	2	6	2					1																		3	2	35					65
426	2	137	3	27.97	345.36	1	2	5	3	1	2	1						1														1			3	3	80						3
427	2	138	3	28.03	345.24	2	1	5	11	1	4					1							1												2	2					99							1
428	22	139	3	28.08	268.95	1	1	5	12	1	6	2																							2	1	100
429	11	140	3	28.2	356.15	2	2	5	10	1	1												2										1		3	2												3
430	6	141	3	28.2	415.44	3	1	1	2	1	5		1																						1	1		100
431	11	142	3	28.22	388.25	1	2	2	5	3	4	1																							1	1	100
432	16	143	3	28.29	544.025	4	1	5	8	1	2																								0	0
433	8	144	3	28.33	358.41	2	2	5	2	1	4					1																	1	1	3	3					90
434	7	145	3	28.3326	386	4	2	3	8	1	6																2				2		2		6	3
435	8	146	3	28.34	435.19	4	2	3	12	2	4	2																							2	1	100
436	10	147	3	28.3807	411.28	2	2	2	8	1	4																					2		1	3	2
437	7	148	3	28.43	324.45	2	3	5	9	1	1	1																							1	1	100
438	6	149	3	28.46	368.45	3	1	5	9	1	6	2				3																			5	2	10				90
439	49	150	3	28.5278	450.08	3	1	8	7	4	4					1																			1	1					100
440	10	151	3	28.58	356.84	1	1	5	10	1	2		1																						1	1		100
441	13	152	3	28.69	380.15	1	2	2	9	3	3		2																		2				4	2		75
442	1	153	3	28.7777	435.89	1	1	10	10	1	6						3																	2	5	2						97
443	5	154	3	28.81	463.14	1	2	5	11	1	1																							2	2	1
444	6	155	3	28.8221	456.02	4	2	7	10	1	1	1																							1	1	100
445	16	156	3	28.8679	401.5	2	2	2	8	2	6																22								22	1
446	15	157	3	28.87	425.16	4	2	5	3	1	4																1							2	3	2
447	1	158	3	28.89	447.35	1	1	5	10	1	3					2																	2		4	2					85
448	3	159	3	28.9001	452.1	2	2	1	8	1	5															1									1	1
449	8	160	3	29.0076	483.25	2	2	2	11	1	5																						2	1	3	2
450	11	161	3	29.04	387.48	1	1	5	3	1	2				2	1																			3	2				5	95
451	5	162	3	29.0472	653.44	5	2	3	13	1	1												1												1	1												100
452	21	163	3	29.1	454.75	4	1	1	4	3	6											2													2	1											100
453	15	164	3	29.1477	440.6	2	2	2	8	2	4																				2		2		4	2
454	5	165	3	29.23	426.4	7	2	3	6	1	4					1																			1	1					100
455	14	166	3	29.32	445.09	7	2	1	6	3	6																						1		1	1
456	25	167	3	29.38	514.09	4	1	5	8	1	3	1																					1		2	2	65
457	5	168	3	29.4754	463.5	4	2	3	8	1	6																						1	1	2	2
458	10	169	3	29.514	644.7	2	3	1	11	2	5																							5	5	1
459	7	170	3	29.56	445.33	3	1	1	4	1	4	1																					1		2	2	60
460	12	171	3	29.61	493.47	4	1	1	4	2	2																							3	3	1
461	1	172	3	29.75	475.36	5	2	1	12	2	3						1						1												2	2						95						5
462	5	173	3	29.86	365.7	4	2	5	9	1	3	1			4																				5	2	85			15
463	14	174	3	29.88	409.33	1	2	1	5	2	6						2																1		3	2						95
464	19	175	3	29.89	449.32	2	3	2	4	3	2																							2	2	1
465	19	176	3	29.89	715.44	2	2	5	8	1	3	1															4								5	2	20
466	13	177	3	30.1302	437.5	4	2	1	8	2	3																				1		2		3	2
467	10	178	3	30.15	498.2	5	2	2	5	2	4																							2	2	1
468	21	179	3	30.27	662.057	3	1	5	8	1	1	1																							1	1	100
469	4	180	3	30.5917	675.63	4	2	3	13	3	6									1							1								2	2									60
470	9	181	3	30.6	463.04	5	1	1	5	1	6																						3	1	4	2
471	12	182	3	30.61	436.79	2	2	5	3	1	3																				1	3			4	2
472	4	183	3	30.61	505.88	2	3	1	6	2	6																1								1	1
473	22	184	3	30.62	675.44	4	1	5	8	1	1																2								2	1
474	18	185	3	30.64	677.88	2	1	5	8	1	3																					2		1	3	2
475	12	186	3	30.6571	553.55	1	1	8	7	1	5	1																							1	1	100
476	26	187	3	30.6733	471.9	5	1	8	7	2	6	1				1																1			3	3	1				75
477	13	188	3	30.89	666.334	4	1	5	8	1	2	1																							1	1	100
478	2	189	3	30.89	300.15	1	1	5	9	1	4					1											2							1	4	3					70
479	2	190	3	30.94	464.09	2	3	2	4	1	1																						1		1	1
480	6	191	3	30.98	624.852	4	1	5	8	1	2																					1		1	2	2
481	7	192	3	31.0193	771.11	3	2	1	11	1	6																1							3	4	2
482	20	193	3	31.1656	582.91	2	3	8	7	2	4																					2			2	1
483	5	194	3	31.2909	512.4	5	1	7	10	1	3																							2	2	1
484	8	195	3	31.48	527.1	5	1	1	5	1	6													1									1	2	4	3													40
485	4	196	3	31.49	334.048	5	2	5	8	1	5	2																				1		2	5	3	75
486	5	197	3	31.5271	494.91	1	1	8	7	1	1							1																	1	1							100
487	6	198	3	31.5461	485	4	2	10	10	1	6	3																							3	1	100
488	4	199	3	31.73	512.45	3	2	5	11	1	4	3																							3	1	100
489	8	200	3	31.7345	473.92	3	1	7	10	1	3	1																							1	1	100
490	14	201	3	31.93	346.877	4	2	5	8	1	6	1			2																				3	2	65			35
491	1	202	3	32.0371	613.62	3	2	3	11	1	6																1								1	1
492	23	203	3	32.1	490.996	4	2	5	8	1	4									1											2				3	2									60
493	7	204	3	32.1	570	3	1	2	1	3	6	1																							1	1	100
494	17	205	3	32.12	524.1	4	2	5	8	1	4					2																			2	1					100
495	4	206	3	32.2	564	3	1	2	1	3	6	2																							2	1	100
496	6	207	3	32.3107	591.61	7	2	3	8	1	6																					1		1	2	2
497	10	208	3	32.34	475.18	5	2	2	6	2	6					1																			1	1					100
498	3	209	3	32.38	630.411	3	2	5	8	1	2	1					1																		2	2	50					50
499	9	210	3	32.51	376.813	4	2	5	8	1	5																						2	2	4	2
500	26	211	3	32.59	665.479	4	2	5	8	1	2																3								3	1
501	15	212	3	32.5991	900	5	1	8	7	1	3																					1			1	1
502	6	213	3	32.65	538.23	3	2	7	6	1	6	1																2							3	2	45
503	1	214	3	32.73	616.82	2	2	1	3	1	1																					1			1	1
504	23	215	3	32.9456	660.97	5	1	8	7	2	3																					1			1	1
505	45	216	3	32.9848	619.45	1	2	8	7	4	1																							1	1	1
506	12	217	3	33.0444	672.29	5	2	1	8	2	3	1																				3			4	2	2
507	8	218	3	33.1	662.913	5	2	5	8	1	2	1																				1			2	2	90
508	7	219	3	33.1	533.334	4	2	5	8	1	4									1														1	2	2									85
509	1	220	3	33.13	673.58	3	2	7	6	1	6	3																							3	1	100
510	11	221	3	33.1395	1000	1	1	8	7	1	3																					1			1	1
511	6	222	3	33.2	667	2	2	2	1	3	6		4																						4	1		100
512	5	223	3	33.31	618.11	4	2	7	6	1	1																						1		1	1
513	13	224	3	33.3238	445.81	3	1	8	7	1	6	1				1																1			3	3	2				58
514	2	225	3	33.4	505.109	4	2	5	8	1	3	1																							1	1	100
515	3	226	3	33.4669	644.51	2	3	8	7	1	3																						1	2	3	2
516	21	227	3	33.5337	800	5	1	8	7	2	5					2																2			4	2					85
517	8	228	3	33.6	711	2	2	3	1	1	6		1																						1	1		100
518	7	229	3	33.81	697.1	4	2	7	6	1	6						1										2		1						4	3						5
519	10	230	3	33.97	657.353	4	2	5	8	1	3	2																						1	3	2	95
520	36	231	3	34.3012	736.57	6	2	8	7	3	2																							1	1	1
521	2	232	3	34.4883	620.53	5	2	7	10	1	6	2																							2	1	100
522	13	233	3	34.773	638.24	5	2	1	9	1	1																							1	1	1
523	34	1	4	35.3942	621.33	6	2	8	7	3	3	2																							2	1	100
524	6	2	4	35.4152	535.6	1	1	8	7	1	6					1																			1	1					100
525	8	3	4	35.9886	1000	1	2	8	7	1	4					1																			1	1					100
526	1	4	4	37.9317	800	4	2	7	10	1	1																					1		1	2	2
527	5	5	4	38.61	1000	4	2	2	3	1	2																					1	1		2	2
528	30	6	4	39.2531	795.21	4	2	7	6	2	6																		1						1	1
529	51	7	4	39.363	1000	1	2	8	7	4	4					1																1		1	3	3					80
530	15	8	4	39.86	1000	4	2	5	8	1	5					2																		1	3	2					70
531	7	9	4	39.9733	900	3	1	8	7	1	6																					1			1	1
532	5	10	4	40.28	1000	3	2	5	8	1	6	1				2																	1		4	3	20				70
533	29	11	4	40.6908	1000	7	2	8	7	3	5							1															2		3	2							10
534	11	12	4	41.02	1000	5	2	5	8	1	3	1															2								3	2	15
535	10	13	4	41.0966	1200	2	2	8	7	1	6	1																							1	1	100
536	18	14	4	41.7929	800	5	1	8	7	2	3	1																							1	1	100
537	39	15	4	42.2988	1100	1	2	8	7	4	2																						1		1	1
538	42	16	4	44.3184	1700	5	1	8	7	4	6					1																1			2	2					90
539	19	17	4	44.319	1200	2	2	8	7	2	2																							2	2	1
540	20	18	4	44.38	1200	4	2	5	8	1	1																						2		2	1
541	1	19	4	46.11	1300	3	2	5	8	1	4	1								1															2	2	40								60
											N	231	27	8	36	48	28	9	4	23	3	4	26	26	1	4	104	2	4	15	130	61	117	159	1070		1.28281	average FT
											%N	21.5888	2.52336	0.747664	3.36449	4.48598	2.61682	0.841121	0.373832	2.14953	0.280374	0.373832	2.42991	2.42991	0.0934579	0.373832	9.71963	0.186916	0.373832	1.40187	12.1495	5.70093	10.9346	14.8598	100		0.530077	SD FT
											FO	159	16	4	16	40	18	9	4	19	2	2	21	17	1	2	27	1	4	10	78	50	93	101	694
											%FO	22.9107	2.30548	0.576369	2.30548	5.76369	2.59366	1.29683	0.576369	2.73775	0.288184	0.288184	3.02594	2.44957	0.144092	0.288184	3.89049	0.144092	0.576369	1.44092	11.2392	7.20461	13.4006	14.5533	100
											V	17171	1415	400	940	3745	1574	387	392	1590	120	150	344	988	100	200	2231	55	320	920	3295	3937	7303	6323	53900
											%V	31.8571	2.62523	0.742115	1.74397	6.94805	2.92022	0.717996	0.727273	2.94991	0.222635	0.278293	0.638219	1.83302	0.185529	0.371058	4.13915	0.102041	0.593692	1.70686	6.11317	7.30427	13.5492	11.731	100
											IRI	1224.48	11.87	0.858662	11.7774	65.9022	14.3612	2.02191	0.634642	13.961	0.144959	0.187932	9.28395	10.4423	0.0401998	0.214666	53.9174	0.0416364	0.557651	4.47944	205.258	93.6974	328.096	386.984	2439.21
											%IRI	50.1998	0.48663	0.0352024	0.482837	2.70178	0.588764	0.0828919	0.0260183	0.572356	0.00594286	0.00770462	0.380612	0.428102	0.00164806	0.0088006	2.21044	0.00170696	0.0228619	0.183643	8.41492	3.84129	13.4509	15.8651	100
											FL	3.10166
											SD	1.71562
											3.10166	3.10166
											1.71562
[truncated: 12 more columns]

## Sheet: data for cluster
%V
	E. tetradactylum	S. commerson	E. jonesi	H. kelee	J. belangerii	L. russelii	O. ruber	P. niger	S. argus	S. lysan	E. coioides
shrimp	36.25	32	0	7.14	31.05	46.43	30.24	16.67	0	14.62	28.08
squid	6.23	0	0	0	0	0	0	0	0	16.54	0
polychaete	2.66	0	4.69	0.7	0	4.05	0	2.5	0	0	0
zooplankton	1.28	4.33	15.31	11.12	25.53	0	0	48.75	21.54	11.54	1.15
phytoplankton	0	0.33	29.38	6.3	2.63	0	0	10.42	11.54	0	0.38
detritus	0	0	11.25	57.14	0	0	9.52	0	37.69	0	0
algae	0	0	0	0	0	0	0	0	17.69	0	0
bivalve	0.51	0	11.88	0	0	0	3.1	6.25	0	0	1.54
crab	0	0	0	1.39	16.58	15.95	2.38	0	0	0	14.62
teleost fish and parts	30.51	45	22.5	12	16.05	24.05	53.81	15.42	11.54	36.54	42.31
